# Supplementary material for: DEA-based impact assessment and forecasting: The case of SDG compliance in Europe after Covid-19
Source: Research Square preprint supplement (doi:10.21203/rs.3.rs-6614879/v1), 2025-05-14
Supplement: Supplementary file 1 [file e5975287f364711e35fd36f8.pdf]

SUPPLEMENTARY MATERIAL. INDEX SCORES WITH RESPECT TO PRE-COVID YEAR

Table B.1: Countries: scores (% change) over time

| Country     | 2020    | 2021    | 2022    | 2023    | 2024    | 2025    | 2026    | 2027    | 2028    | 2029    | 2030    |
|-------------|---------|---------|---------|---------|---------|---------|---------|---------|---------|---------|---------|
| Denmark     | -1.92%  | -0.6%   | -0.36%  | 1.56%   | 1.32%   | 2.16%   | 2.88%   | 3.48%   | 4.08%   | 4.68%   | 5.28%   |
| Slovenia    | -1.2%   | 4.93%   | 7.22%   | 2.77%   | 2.77%   | 3.13%   | 3.49%   | 3.85%   | 4.09%   | 4.21%   | 4.33%   |
| Romania     | -1.18%  | -0.24%  | 0%      | 0.47%   | 0.47%   | 0.95%   | 1.3%    | 1.66%   | 1.9%    | 2.25%   | 2.49%   |
| Ireland     | 0.96%   | 1.91%   | 4.19%   | 1.2%    | 1.2%    | 1.2%    | 1.2%    | 1.2%    | 1.2%    | 1.32%   | 1.44%   |
| Czechia     | -0.59%  | -0.47%  | 0.95%   | 0.47%   | 0.47%   | 0.59%   | 0.71%   | 0.95%   | 1.07%   | 1.18%   | 1.18%   |
| Spain       | -3.85%  | -2.88%  | -1.92%  | -2.52%  | -2.88%  | -2.4%   | -2.04%  | -1.68%  | -1.2%   | -0.84%  | -0.48%  |
| Sweden      | -7.91%  | -5.76%  | -4.8%   | -5.4%   | -5.4%   | -4.68%  | -3.84%  | -3.12%  | -2.4%   | -1.68%  | -1.08%  |
| Lithuania   | -1.57%  | -2.42%  | -2.9%   | -0.73%  | -0.73%  | -0.97%  | -1.21%  | -1.45%  | -1.57%  | -1.69%  | -1.69%  |
| Slovakia    | -2.61%  | -5.21%  | -0.71%  | -2.37%  | -2.73%  | -2.61%  | -2.61%  | -2.49%  | -2.37%  | -2.25%  | -2.25%  |
| Greece      | -6.35%  | -5.25%  | -2.56%  | -4.52%  | -4.76%  | -4.4%   | -3.91%  | -3.54%  | -3.3%   | -2.93%  | -2.69%  |
| Italy       | -6.33%  | -5.24%  | -5.6%   | -5.97%  | -6.09%  | -5.97%  | -5.85%  | -5.72%  | -5.6%   | -5.6%   | -5.48%  |
| Poland      | -5.5%   | -5.02%  | -6.22%  | -5.62%  | -5.86%  | -5.86%  | -5.74%  | -5.74%  | -5.74%  | -5.74%  | -5.74%  |
| Bulgaria    | -2.6%   | -3.07%  | -4.14%  | -4.61%  | -4.49%  | -4.85%  | -5.2%   | -5.44%  | -5.67%  | -5.91%  | -6.15%  |
| Hungary     | -2.27%  | -5.73%  | -5.13%  | -5.01%  | -5.01%  | -5.37%  | -5.85%  | -6.32%  | -6.68%  | -7.16%  | -7.64%  |
| Germany     | -13.26% | -12.32% | -11.62% | -11.03% | -11.03% | -10.56% | -10.09% | -9.62%  | -9.15%  | -8.8%   | -8.45%  |
| Portugal    | -10.46% | -10.11% | -9.04%  | -7.85%  | -9.87%  | -9.63%  | -9.51%  | -9.27%  | -9.04%  | -8.92%  | -8.68%  |
| Latvia      | -9.28%  | -7.47%  | -9.28%  | -9.4%   | -9.76%  | -9.88%  | -10%    | -10%    | -10.12% | -10.12% | -10%    |
| Cyprus      | -10.65% | -8.25%  | -8.61%  | -8.73%  | -11.24% | -11.36% | -11.36% | -11.36% | -11.24% | -11.12% | -11%    |
| Finland     | -1.09%  | -3.38%  | -4.95%  | -5.43%  | -6.28%  | -7.25%  | -8.09%  | -8.94%  | -9.66%  | -10.39% | -11.11% |
| Luxembourg  | -11.54% | -7.69%  | -9.62%  | -10.34% | -13.34% | -13.46% | -13.46% | -13.46% | -13.34% | -13.1%  | -12.98% |
| Estonia     | -11.48% | -13.76% | -12.2%  | -13.16% | -13.52% | -14%    | -14.35% | -14.59% | -14.83% | -14.83% | -14.95% |
| Netherlands | -18.14% | -17.08% | -15.78% | -11.66% | -18.14% | -17.55% | -17.08% | -16.61% | -16.25% | -16.14% | -16.02% |
| Malta       | -11.98% | -12.34% | -14.59% | -11.98% | -14.95% | -15.42% | -15.78% | -16.01% | -16.13% | -16.13% | -16.13% |
| Serbia      | -4.06%  | -1.57%  | -3.66%  | -15.71% | -15.71% | -15.97% | -16.23% | -16.23% | -16.23% | -16.23% | -16.23% |
| Austria     | -20.67% | -19.6%  | -19.12% | -18.88% | -19.36% | -18.76% | -18.29% | -17.81% | -17.34% | -16.86% | -16.51% |
| North Maced | -7.47%  | -15.86% | -15.33% | -15.33% | -15.33% | -15.99% | -16.51% | -16.91% | -17.17% | -17.3%  | -17.3%  |
| Switzerland | -19.26% | -16.82% | -20.65% | -18.33% | -18.33% | -18.33% | -18.33% | -18.33% | -18.33% | -18.33% | -18.33% |
| Norway      | -26.99% | -25.21% | -22.59% | -24.02% | -24.49% | -23.66% | -22.95% | -22.35% | -21.76% | -21.28% | -20.81% |
| Croatia     | -26.65% | -24.97% | -26.05% | -26.41% | -26.41% | -25.93% | -25.57% | -25.21% | -24.97% | -24.73% | -24.49% |
| Belgium     | -23.56% | -24.88% | -24.4%  | -25.12% | -25.12% | -25.24% | -25.48% | -25.72% | -26.08% | -26.32% | -26.67% |
| Turkey      | -16.82% | -22.04% | -22.51% | -22.99% | -27.49% | -27.84% | -27.96% | -27.96% | -28.08% | -28.08% | -28.08% |
| France      | -12.98% | -28.97% | -28.85% | -28.25% | -28.25% | -29.33% | -29.57% | -29.57% | -29.57% | -29.57% | -29.57% |
| Q3          | -2.52%  | -3.03%  | -2.82%  | -4.02%  | -4.09%  | -3.95%  | -3.53%  | -2.96%  | -2.39%  | -2.11%  | -2.11%  |
| Median      | -7.69%  | -6.61%  | -7.42%  | -8.29%  | -9.81%  | -9.76%  | -9.76%  | -9.45%  | -9.41%  | -9.52%  | -9.34%  |
| Average     | -9.35%  | -9.6%   | -9.4%   | -9.84%  | -10.64% | -10.6%  | -10.54% | -10.45% | -10.36% | -10.26% | -10.18% |
| Q1          | -13.05% | -16.1%  | -15.45% | -15.43% | -16.31% | -16.38% | -16.66% | -16.68% | -16.48% | -16.39% | -16.3%  |

Table B.2: Regions: scores (% change) over time

| Name             | 2020   | 2021   | 2022   | 2023   | 2024   | 2025   | 2026  | 2027  | 2028  | 2029  | 2030   |
|------------------|--------|--------|--------|--------|--------|--------|-------|-------|-------|-------|--------|
| DK05-Nordjylland | -0.80% | 2.01%  | 3.91%  | 8.78%  | 8.25%  | 8.66%  | 9.02% | 9.34% | 9.60% | 9.83% | 10.06% |
| SE11-Stockholm   | 1.29%  | 3.27%  | 5.75%  | 7.27%  | 7.27%  | 7.72%  | 8.17% | 8.61% | 9.04% | 9.47% | 9.88%  |
| SE31-Norra Mella | 1.55%  | 8.22%  | 8.15%  | 5.81%  | 5.81%  | 6.30%  | 6.78% | 7.25% | 7.71% | 8.16% | 8.60%  |
| ES21-Euskadi     | -1.66% | 0.87%  | 3.51%  | 6.35%  | 5.83%  | 6.13%  | 6.44% | 6.76% | 7.10% | 7.44% | 7.79%  |
| ES41-Cast-León   | -0.36% | 1.75%  | 1.29%  | 4.38%  | 4.46%  | 4.76%  | 5.08% | 5.40% | 5.74% | 6.09% | 6.43%  |
| SE23-Västsverige | -1.12% | 3.16%  | 5.91%  | 3.25%  | 3.25%  | 3.80%  | 4.35% | 4.88% | 5.39% | 5.90% | 6.39%  |
| ES22-Navarra     | -1.15% | -4.31% | 1.64%  | 3.07%  | 3.38%  | 3.71%  | 4.05% | 4.39% | 4.75% | 5.11% | 5.46%  |
| BE10-Bruxelles   | -3.86% | 0.29%  | 0.16%  | 2.87%  | 3.19%  | 3.28%  | 3.48% | 3.75% | 4.09% | 4.46% | 4.85%  |
| SI04-Zahodna Slo | -2.61% | 2.76%  | 7.92%  | 2.92%  | 2.92%  | 3.32%  | 3.72% | 4.12% | 4.48% | 4.73% | 4.84%  |
| ES13-Cantabria   | -4.15% | -1.53% | 3.15%  | 2.89%  | 2.54%  | 2.90%  | 3.27% | 3.64% | 4.01% | 4.39% | 4.77%  |
| SE12-Östra Mella | -2.17% | -1.58% | 1.11%  | 1.10%  | 1.10%  | 1.74%  | 2.37% | 2.98% | 3.57% | 4.15% | 4.72%  |
| DK01-Hovedstaden | -2.71% | -0.74% | -2.08% | 0.02%  | 0.17%  | 1.02%  | 1.83% | 2.60% | 3.33% | 4.01% | 4.64%  |
| DK03-Syddanmark  | 0.05%  | -1.05% | -0.07% | 0.47%  | 0.76%  | 1.50%  | 2.20% | 2.85% | 3.46% | 4.03% | 4.56%  |
| RO11-Nord-Vest   | 2.56%  | 3.17%  | 2.55%  | 3.60%  | 3.60%  | 3.81%  | 3.98% | 4.13% | 4.24% | 4.34% | 4.43%  |
| EL63-D. Elláda   | 6.52%  | 6.38%  | 8.17%  | 7.43%  | 7.43%  | 6.86%  | 6.28% | 5.71% | 5.17% | 4.67% | 4.22%  |
| SE22-Sydsverige  | 1.43%  | -1.05% | 1.34%  | 0.30%  | 0.30%  | 0.99%  | 1.66% | 2.31% | 2.94% | 3.56% | 4.16%  |
| RO41-Sud-Vest Ol | 0.89%  | -2.14% | 2.56%  | 2.37%  | 2.37%  | 2.71%  | 3.03% | 3.32% | 3.59% | 3.84% | 4.07%  |
| ES24-Aragón      | -2.54% | -2.41% | 0.77%  | 1.38%  | 1.65%  | 2%     | 2.36% | 2.72% | 3.09% | 3.46% | 3.83%  |
| SI03-Vzhodna Slo | 0.24%  | 7.08%  | 6.54%  | 2.51%  | 2.51%  | 2.83%  | 3.15% | 3.44% | 3.66% | 3.74% | 3.73%  |
| DK02-Sjælland    | -5.33% | -3.15% | -3.28% | 0.27%  | -0.82% | 0.03%  | 0.85% | 1.63% | 2.37% | 3.06% | 3.70%  |
| ES30-Madrid      | -2.75% | -0.93% | 2.11%  | 1.24%  | 1.33%  | 1.68%  | 2.03% | 2.39% | 2.75% | 3.12% | 3.48%  |
| DK04-Midtjylland | -0.60% | -0.18% | 0.14%  | -1.91% | -1.35% | -0.47% | 0.38% | 1.20% | 1.96% | 2.68% | 3.35%  |
| RO22-Sud-Est     | -1.42% | 0.90%  | 0.16%  | 1.04%  | 1.04%  | 1.45%  | 1.84% | 2.22% | 2.56% | 2.88% | 3.18%  |
| RO31-Sud-Munteni | -0.91% | 2.05%  | 0.73%  | 1.53%  | 1.53%  | 1.85%  | 2.16% | 2.44% | 2.69% | 2.93% | 3.14%  |
| RO21-Nord-Est    | -0.58% | 2.64%  | 1.81%  | 2.74%  | 2.74%  | 2.86%  | 2.95% | 3.01% | 3.03% | 3.04% | 3.05%  |
| RO12-Centru      | 2.11%  | 0.87%  | 1.86%  | 0.36%  | 0.36%  | 0.85%  | 1.32% | 1.77% | 2.21% | 2.61% | 2.98%  |
| CZ02-Stredni Cec | 2.81%  | 2.53%  | 1.40%  | 4.89%  | 4.89%  | 4.70%  | 4.44% | 4.11% | 3.67% | 3.18% | 2.73%  |
| EL52-K. Makedoni | 1.18%  | 2.50%  | 6.62%  | 5.57%  | 5.57%  | 5.02%  | 4.46% | 3.91% | 3.38% | 2.90% | 2.46%  |
| ES51-Cataluña    | -1.18% | 0.44%  | 0.91%  | 0.37%  | 0.05%  | 0.41%  | 0.77% | 1.13% | 1.50% | 1.87% | 2.24%  |
| CZ03-Jihozápad   | -4.12% | -1.93% | 0.05%  | 2.84%  | 2.84%  | 2.82%  | 2.77% | 2.68% | 2.53% | 2.34% | 2.18%  |
| CZ01-Praha       | -1.94% | 0.96%  | 1.24%  | 0.26%  | 0.26%  | 0.54%  | 0.81% | 1.09% | 1.38% | 1.64% | 1.86%  |
| RO32-Bucuresti-I | -4.98% | -1.06% | -1.56% | -0.25% | -0.25% | 0.13%  | 0.48% | 0.81% | 1.12% | 1.40% | 1.66%  |
| ES11-Galicia     | 0.50%  | 0.98%  | 1.39%  | 1.03%  | -0.72% | -0.33% | 0.07% | 0.46% | 0.85% | 1.23% | 1.62%  |
| IE04-Northern    | 2.44%  | 2.28%  | 3.38%  | 0.76%  | 0.76%  | 0.78%  | 0.84% | 0.93% | 1.08% | 1.34% | 1.59%  |

| Name              | 2020    | 2021    | 2022    | 2023    | 2024    | 2025    | 2026    | 2027    | 2028    | 2029    | 2030    |
|-------------------|---------|---------|---------|---------|---------|---------|---------|---------|---------|---------|---------|
| IE05-Southern     | -0.49%  | 2.89%   | 6.07%   | 1.16%   | 1.16%   | 1.14%   | 1.15%   | 1.19%   | 1.28%   | 1.43%   | 1.58%   |
| CZ08-Moravskosle  | -0.08%  | -2.01%  | 3.54%   | 0.63%   | 0.63%   | 0.81%   | 0.99%   | 1.16%   | 1.32%   | 1.45%   | 1.57%   |
| ES23-La Rioja     | -1.16%  | 0.60%   | -1.73%  | -0.74%  | -0.81%  | -0.41%  | -0.01%  | 0.38%   | 0.77%   | 1.16%   | 1.54%   |
| ES42-Cast-Mancha  | -0.56%  | 0.34%   | -0.26%  | -2.16%  | -0.91%  | -0.51%  | -0.11%  | 0.28%   | 0.67%   | 1.06%   | 1.45%   |
| ES70-Canarias     | -4.09%  | -3.63%  | -0.49%  | 0.20%   | -1.11%  | -0.70%  | -0.29%  | 0.10%   | 0.50%   | 0.89%   | 1.28%   |
| IE06-Eastern      | 0.87%   | 0.52%   | 3.13%   | 1.83%   | 1.83%   | 1.72%   | 1.62%   | 1.52%   | 1.42%   | 1.32%   | 1.23%   |
| PL22-Slaskie      | -0.12%  | 3.86%   | 3.39%   | 3.86%   | 3.86%   | 3.31%   | 2.78%   | 2.27%   | 1.78%   | 1.32%   | 0.88%   |
| CZ06-Jihovýchod   | -0.67%  | -0.21%  | 1.62%   | -1.09%  | -1.09%  | -0.77%  | -0.44%  | -0.10%  | 0.25%   | 0.58%   | 0.86%   |
| ES52-Valencia     | -2.59%  | -2.37%  | -1.62%  | -1.93%  | -1.72%  | -1.32%  | -0.92%  | -0.52%  | -0.13%  | 0.26%   | 0.65%   |
| ES61-Andalucia    | -0.97%  | 0.16%   | -1.74%  | -1.53%  | -2.04%  | -1.62%  | -1.21%  | -0.80%  | -0.40%  | -0.01%  | 0.38%   |
| CZ07-Stredni Mor  | -1.15%  | 0.10%   | 1.49%   | -2.47%  | -2.47%  | -2.04%  | -1.59%  | -1.13%  | -0.63%  | -0.14%  | 0.26%   |
| PL41-Wielkopolsk  | 2.73%   | 0.24%   | -2.48%  | 2.93%   | 2.93%   | 2.41%   | 1.90%   | 1.41%   | 0.94%   | 0.50%   | 0.08%   |
| CZ05-Severovycho  | -0.44%  | -3.79%  | -0.57%  | -2.13%  | -2.13%  | -1.78%  | -1.43%  | -1.06%  | -0.68%  | -0.31%  | 0%      |
| ES12-Asturias     | -3.15%  | 2.45%   | 1.63%   | -0.78%  | -2.55%  | -2.10%  | -1.66%  | -1.23%  | -0.82%  | -0.41%  | -0.01%  |
| ITF6-Calabria     | -5.76%  | -5.69%  | -5.17%  | 0.27%   | 0.27%   | 0.21%   | 0.15%   | 0.10%   | 0.06%   | 0.01%   | -0.02%  |
| SK04-Vychodné Sl  | -3.74%  | -1.47%  | 0.16%   | 1.64%   | 1.64%   | 1.36%   | 1.07%   | 0.78%   | 0.48%   | 0.18%   | -0.09%  |
| CZ04-Severozápad  | 0.45%   | 0.62%   | -1.45%  | -0.06%  | -0.06%  | 0%      | 0.04%   | 0.05%   | 0.02%   | -0.04%  | -0.10%  |
| ES62-Murcia       | -2.02%  | 0.84%   | -4.16%  | -2.91%  | -2.63%  | -2.19%  | -1.77%  | -1.35%  | -0.95%  | -0.55%  | -0.15%  |
| ITF3-Campania     | -2.59%  | 0.18%   | -0.15%  | 0.28%   | 0.28%   | 0.16%   | 0.04%   | -0.07%  | -0.17%  | -0.26%  | -0.34%  |
| SK02-Západné Slo  | -0.14%  | -3.07%  | 0.63%   | 0.77%   | 0.77%   | 0.58%   | 0.39%   | 0.19%   | 0%      | -0.18%  | -0.35%  |
| ES53-Baleares     | -3.67%  | -0.99%  | 0.59%   | -2.14%  | -3.43%  | -3.02%  | -2.62%  | -2.23%  | -1.84%  | -1.45%  | -1.06%  |
| EL51-A. Makedoni  | -2.42%  | -2.08%  | -1.03%  | -0.86%  | -0.86%  | -0.90%  | -0.95%  | -1%     | -1.05%  | -1.10%  | -1.14%  |
| SK03-Stredné Slo  | -0.47%  | -3.13%  | 1.68%   | -1.36%  | -1.36%  | -1.40%  | -1.43%  | -1.46%  | -1.47%  | -1.48%  | -1.49%  |
| PT11-Norte        | -0.96%  | 1.80%   | 2.25%   | 1.05%   | 1.05%   | 0.57%   | 0.10%   | -0.34%  | -0.76%  | -1.15%  | -1.51%  |
| ITG2-Sardegna     | -4.09%  | -2.38%  | 2.23%   | -0.32%  | -0.32%  | -0.56%  | -0.79%  | -1.02%  | -1.22%  | -1.41%  | -1.58%  |
| LT02-Vidurio      | 3.37%   | -0.08%  | -1.35%  | 0.34%   | 0.34%   | -0.03%  | -0.39%  | -0.74%  | -1.07%  | -1.38%  | -1.62%  |
| EL64-Stereia Ellá | -1.55%  | 2.56%   | 5.96%   | -1.63%  | -1.63%  | -1.62%  | -1.62%  | -1.62%  | -1.63%  | -1.64%  | -1.64%  |
| LT01-Sostines re  | -6.50%  | -4.92%  | -4.42%  | -1.92%  | -1.92%  | -2.04%  | -2.13%  | -2.17%  | -2.11%  | -1.96%  | -1.79%  |
| RO42-Vest         | -6.77%  | -7.66%  | -7.71%  | -6.87%  | -6.87%  | -6%     | -5.13%  | -4.26%  | -3.41%  | -2.61%  | -1.87%  |
| HU33-Dél-Alföld   | 2.89%   | -0.66%  | 1.74%   | 2.25%   | 2.25%   | 1.47%   | 0.72%   | 0.01%   | -0.67%  | -1.33%  | -1.97%  |
| ES43-Extremadura  | -6.55%  | -3.62%  | -5.22%  | -4.10%  | -4.68%  | -4.19%  | -3.73%  | -3.30%  | -2.88%  | -2.47%  | -2.06%  |
| EL43-Kriti        | -3.50%  | -1.25%  | -1.52%  | -2.98%  | -2.98%  | -2.79%  | -2.62%  | -2.46%  | -2.32%  | -2.19%  | -2.08%  |
| PL21-Malopolskie  | 0.78%   | 1.02%   | 0.68%   | -0.43%  | -0.43%  | -0.76%  | -1.08%  | -1.38%  | -1.66%  | -1.92%  | -2.17%  |
| EL30-Attiki       | -3.84%  | -2.32%  | -1.17%  | -2.08%  | -2.08%  | -2.10%  | -2.13%  | -2.15%  | -2.18%  | -2.21%  | -2.24%  |
| PL62-Warmińsko-m  | -5.83%  | -1.48%  | -0.21%  | -0.99%  | -0.99%  | -1.24%  | -1.49%  | -1.72%  | -1.93%  | -2.13%  | -2.32%  |
| AT13-Wien         | -14.39% | -8.23%  | -7.89%  | -6.02%  | -6.02%  | -5.55%  | -5.03%  | -4.48%  | -3.89%  | -3.28%  | -2.66%  |
| ITF4-Puglia       | -5.02%  | -3.42%  | -1.40%  | -3.32%  | -3.32%  | -3.20%  | -3.08%  | -2.97%  | -2.86%  | -2.77%  | -2.68%  |
| PL81-Lubelskie    | 2.51%   | -0.99%  | -2.57%  | -1.44%  | -1.44%  | -1.68%  | -1.92%  | -2.14%  | -2.34%  | -2.53%  | -2.71%  |
| EL54-Ipeiros      | -3.57%  | -6.54%  | -7.77%  | -6.20%  | -6.68%  | -5.92%  | -5.19%  | -4.52%  | -3.91%  | -3.37%  | -2.90%  |
| ITF5-Basilicata   | -1.95%  | -3.79%  | -3.20%  | -3.96%  | -3.96%  | -3.77%  | -3.58%  | -3.40%  | -3.24%  | -3.09%  | -2.95%  |
| BG34-Yugoiztoche  | -1.28%  | 0.94%   | 1.32%   | 0.16%   | 1.64%   | 0.81%   | -0.01%  | -0.81%  | -1.58%  | -2.30%  | -2.95%  |
| HU31-Észak-Magya  | -1.08%  | -0.42%  | 1.51%   | 0.98%   | 0.98%   | 0.23%   | -0.49%  | -1.18%  | -1.84%  | -2.48%  | -3.10%  |
| PL61-Kujawsko-po  | -4.80%  | -2.07%  | -3.69%  | -1.84%  | -1.84%  | -2.08%  | -2.31%  | -2.53%  | -2.74%  | -2.93%  | -3.11%  |
| ITG1-Sicilia      | -3.72%  | -1.81%  | -4.69%  | -4.37%  | -4.37%  | -4.18%  | -4%     | -3.82%  | -3.66%  | -3.51%  | -3.38%  |
| HU23-Dél-Dunántú  | 0.90%   | -3.14%  | 0.40%   | 0.52%   | 0.52%   | -0.20%  | -0.89%  | -1.56%  | -2.20%  | -2.81%  | -3.41%  |
| EL62-Ionia Nisia  | -15.03% | -6.68%  | -1.47%  | -6.38%  | -7.33%  | -6.59%  | -5.89%  | -5.25%  | -4.66%  | -4.14%  | -3.69%  |
| ⋮                 | ⋮       | ⋮       | ⋮       | ⋮       | ⋮       | ⋮       | ⋮       | ⋮       | ⋮       | ⋮       | ⋮       |
| RS11-Belgrade     | -5.83%  | -3.51%  | -3.92%  | -16.65% | -16.65% | -17.06% | -17.31% | -17.44% | -17.52% | -17.58% | -17.63% |
| HU22-Nyugat-Duná  | -9.60%  | -16.06% | -15.99% | -18.63% | -18.63% | -18.36% | -18.16% | -18.03% | -18%    | -18.03% | -18.07% |
| CH01-Région léma  | -20.33% | -16.62% | -22.21% | -19.27% | -19.27% | -19.07% | -18.87% | -18.68% | -18.50% | -18.37% | -18.31% |
| CH04-Zürich       | -21.01% | -18.33% | -22.02% | -21.32% | -21.32% | -20.65% | -20.01% | -19.43% | -18.93% | -18.58% | -18.41% |
| CH03-Nordwestsch  | -18.45% | -17.75% | -21.93% | -19.56% | -19.56% | -19.34% | -19.12% | -18.92% | -18.73% | -18.59% | -18.52% |
| CH02-Espace Mitt  | -17.84% | -15.92% | -18.16% | -16.63% | -16.63% | -17.13% | -17.60% | -18.01% | -18.34% | -18.57% | -18.68% |
| AT33-Tirol        | -20.20% | -19.91% | -17.67% | -21.55% | -21.59% | -21.06% | -20.56% | -20.09% | -19.64% | -19.19% | -18.74% |
| CH05-Ostschweiz   | -20.76% | -15.77% | -17.80% | -18.84% | -18.84% | -18.91% | -18.96% | -18.99% | -19.01% | -19.01% | -19.01% |
| CH06-Zentralschw  | -19.25% | -18.43% | -22.92% | -19.38% | -19.38% | -19.47% | -19.54% | -19.59% | -19.62% | -19.64% | -19.65% |
| NO02-Innlandet    | -26.62% | -24.29% | -20.13% | -22.18% | -24.65% | -23.91% | -23.22% | -22.60% | -22.03% | -21.51% | -21.02% |
| AT34-Vorarlberg   | -25.56% | -23.80% | -20.39% | -24.04% | -24.08% | -23.54% | -23.06% | -22.62% | -22.20% | -21.80% | -21.39% |
| ES63-Ceuta        | -15.41% | -24.44% | -22.81% | -24.58% | -24.38% | -23.72% | -23.17% | -22.71% | -22.33% | -22.01% | -21.70% |
| SE32-Mellersta N  | -24.19% | -25.06% | -29.47% | -29.37% | -29.37% | -28.08% | -26.84% | -25.65% | -24.52% | -23.42% | -22.35% |
| AT21-Kärnten      | -24.89% | -24.54% | -26.16% | -25.84% | -27.12% | -26.59% | -26.13% | -25.72% | -25.35% | -25%    | -24.66% |
| NO08-Oslo og Vik  | -35.17% | -31.95% | -31.78% | -30.60% | -30.60% | -29.46% | -28.42% | -27.47% | -26.60% | -25.81% | -25.07% |
| ES64-Melilla      | -20.42% | -19.62% | -15.85% | -28.45% | -28.15% | -27.48% | -26.92% | -26.47% | -26.12% | -25.83% | -25.55% |
| BE32-Hainaut      | -26.21% | -21.69% | -20.48% | -23.62% | -23.97% | -24.16% | -24.41% | -24.72% | -25.07% | -25.45% | -25.85% |
| BE31-Brabant Wal  | -24.08% | -24.02% | -23.43% | -24.33% | -24.68% | -24.85% | -25.08% | -25.35% | -25.66% | -26%    | -26.35% |
| TRC3-Mardin       | -21.47% | -26.45% | -27.17% | -25.18% | -29.61% | -28.58% | -27.88% | -27.44% | -27.16% | -26.98% | -26.87% |
| TR72-Kayseri      | -17.13% | -17.18% | -19.50% | -21.31% | -25.82% | -26.33% | -26.62% | -26.79% | -26.89% | -26.95% | -26.98% |
| BE33-Liège        | -22.13% | -23.24% | -23.34% | -24.99% | -25.31% | -25.50% | -25.75% | -26.06% | -26.41% | -26.79% | -27.19% |
| TR63-Hatay        | -16.71% | -21.21% | -20.10% | -22.60% | -27.23% | -27.30% | -27.30% | -27.30% | -27.29% | -27.28% | -27.27% |
| TR42-Kocaeli      | -14.93% | -19.46% | -20.44% | -21.45% | -25.93% | -26.54% | -26.90% | -27.11% | -27.23% | -27.31% | -27.35% |
| TR41-Erzurum      | -15.90% | -24.15% | -27.38% | -26.31% | -30.83% | -29.58% | -28.75% | -28.22% | -27.89% | -27.68% | -27.55% |

| Name             | 2020    | 2021    | 2022    | 2023    | 2024    | 2025    | 2026    | 2027    | 2028    | 2029    | 2030    |
|------------------|---------|---------|---------|---------|---------|---------|---------|---------|---------|---------|---------|
| NO0A-Vestlandet  | -34.17% | -32.42% | -32.27% | -34.36% | -34.36% | -32.96% | -31.68% | -30.51% | -29.45% | -28.47% | -27.56% |
| TR51-Ankara      | -17.15% | -21.41% | -20.93% | -19.76% | -24.16% | -25.59% | -26.48% | -27.03% | -27.37% | -27.57% | -27.69% |
| TR22-Balikesir   | -17.12% | -23.92% | -22.57% | -22.55% | -27.12% | -27.41% | -27.56% | -27.65% | -27.69% | -27.72% | -27.73% |
| TRC2-Saniurfa    | -18.39% | -20.96% | -22.86% | -23.70% | -28.27% | -28.13% | -28.01% | -27.92% | -27.86% | -27.82% | -27.79% |
| TRB1-Malatya     | -14.20% | -20.14% | -22.14% | -22.20% | -26.92% | -27.33% | -27.56% | -27.69% | -27.77% | -27.81% | -27.84% |
| TR31-Izmir       | -17.14% | -22.10% | -23.26% | -24.25% | -28.73% | -28.56% | -28.41% | -28.30% | -28.23% | -28.19% | -28.16% |
| TR33-Manisa      | -16.17% | -22.33% | -24.84% | -25.22% | -29.73% | -29.22% | -28.86% | -28.63% | -28.48% | -28.38% | -28.32% |
| BE35-Namur       | -25.25% | -26.59% | -23.90% | -25.73% | -26.22% | -26.43% | -26.72% | -27.07% | -27.47% | -27.91% | -28.37% |
| BE24-Vlaams-Brab | -25.35% | -29.20% | -29.23% | -27.40% | -27.21% | -27.36% | -27.54% | -27.76% | -28%    | -28.27% | -28.55% |
| TR10-Istanbul    | -17.95% | -22.43% | -21.51% | -21.69% | -26.11% | -27.12% | -27.74% | -28.11% | -28.34% | -28.48% | -28.56% |
| TR21-Tekirdag    | -16.70% | -21.65% | -22.17% | -24.09% | -28.50% | -28.63% | -28.68% | -28.70% | -28.70% | -28.70% | -28.70% |
| NO09-Agder og Sø | -42.10% | -39.74% | -34.70% | -36.35% | -36.45% | -34.88% | -33.45% | -32.14% | -30.94% | -29.84% | -28.82% |
| TR90-Trabzon     | -13.29% | -22.43% | -23.67% | -21.62% | -26.68% | -27.58% | -28.12% | -28.45% | -28.65% | -28.77% | -28.84% |
| TR32-Aydin       | -15.40% | -21.87% | -19.60% | -21.62% | -26.33% | -27.37% | -28.01% | -28.39% | -28.63% | -28.77% | -28.85% |
| TR83-Samsun      | -16.18% | -23.70% | -22.45% | -22.72% | -27.46% | -28.06% | -28.41% | -28.61% | -28.74% | -28.81% | -28.86% |
| TR82-Kastamonu   | -17.76% | -25.33% | -22.53% | -23.42% | -28.22% | -28.53% | -28.70% | -28.79% | -28.84% | -28.88% | -28.89% |
| FRE1-Nord-Pas de | -12.94% | -28.35% | -27.88% | -26.76% | -26.76% | -28.46% | -28.87% | -28.97% | -28.99% | -29%    | -29%    |
| FRJ1-Languedoc-R | -12.30% | -27.31% | -27.65% | -27.87% | -27.87% | -28.80% | -29.03% | -29.08% | -29.09% | -29.09% | -29.09% |
| FRL0-Provence-Al | -9.53%  | -25.76% | -24.27% | -25.23% | -25.23% | -28.21% | -28.95% | -29.12% | -29.17% | -29.18% | -29.18% |
| FRF2-Champagne-A | -11.01% | -27.78% | -26.33% | -23.79% | -23.79% | -27.87% | -28.89% | -29.13% | -29.19% | -29.20% | -29.20% |
| FRD2-Haute-Norma | -8.97%  | -26.53% | -25.85% | -26.50% | -26.50% | -28.70% | -29.24% | -29.37% | -29.40% | -29.40% | -29.40% |
| FRF3-Lorraine    | -11.06% | -30.54% | -30.81% | -29.27% | -29.27% | -29.40% | -29.43% | -29.43% | -29.43% | -29.43% | -29.43% |
| BE21-Antwerpen   | -25.66% | -27.59% | -27.93% | -27.88% | -27.81% | -27.98% | -28.21% | -28.48% | -28.79% | -29.12% | -29.48% |
| FRM0-Corse       | -21.32% | -41.70% | -45.96% | -44.05% | -44.05% | -33%    | -30.31% | -29.67% | -29.52% | -29.49% | -29.48% |
| FRF1-Alsace      | -8.76%  | -26.98% | -27.20% | -24.21% | -24.21% | -28.21% | -29.21% | -29.44% | -29.50% | -29.51% | -29.51% |
| FR10-Ile-de-Fran | -11.69% | -21.23% | -20.69% | -20.60% | -20.60% | -27.29% | -28.99% | -29.40% | -29.49% | -29.51% | -29.52% |
| FR12-Limousin    | -21.39% | -32.40% | -33.79% | -28.41% | -29.55% | -29.61% | -29.61% | -29.61% | -29.61% | -29.61% | -29.61% |
| FR13-Poitou-Char | -10.41% | -30.36% | -27.84% | -24.86% | -24.86% | -28.45% | -29.34% | -29.55% | -29.60% | -29.61% | -29.61% |
| FRD1-Basse-Norma | -15.23% | -29.89% | -32.36% | -27.60% | -27.60% | -29.15% | -29.52% | -29.61% | -29.63% | -29.63% | -29.63% |
| TRA2-Agri        | -17.83% | -24.61% | -23.60% | -23.76% | -28.40% | -28.94% | -29.25% | -29.43% | -29.54% | -29.60% | -29.64% |
| FRG0-Pays de la  | -11.43% | -31.22% | -32.19% | -29.66% | -29.66% | -29.69% | -29.69% | -29.69% | -29.69% | -29.69% | -29.69% |
| FR11-Aquitaine   | -10.94% | -27.84% | -24.97% | -26.53% | -26.53% | -28.96% | -29.56% | -29.69% | -29.73% | -29.74% | -29.74% |
| FRK1-Auvergne    | -19.84% | -32.77% | -32.63% | -35.05% | -35.05% | -31.05% | -30.06% | -29.82% | -29.77% | -29.76% | -29.75% |
| FRK2-Rhône-Alpes | -13.89% | -27.89% | -26.23% | -26.09% | -26.09% | -28.87% | -29.55% | -29.71% | -29.75% | -29.76% | -29.76% |
| FRE2-Picardie    | -8.94%  | -25.77% | -25.36% | -26.43% | -26.43% | -28.98% | -29.60% | -29.75% | -29.78% | -29.79% | -29.79% |
| FRJ2-Midi-Pyréné | -15.34% | -28.75% | -29.35% | -30.62% | -30.62% | -30.02% | -29.86% | -29.82% | -29.81% | -29.81% | -29.81% |
| FRH0-Bretagne    | -10.70% | -27.10% | -27.39% | -28.95% | -28.95% | -29.63% | -29.78% | -29.82% | -29.83% | -29.83% | -29.83% |
| FRC2-Franche-Com | -13.71% | -24.90% | -25.24% | -28.34% | -28.34% | -29.56% | -29.85% | -29.91% | -29.93% | -29.93% | -29.93% |
| HR06-Sjeverna Hr | -35.63% | -34.34% | -33.15% | -32.72% | -32.72% | -32.08% | -31.53% | -31.06% | -30.66% | -30.30% | -29.97% |
| FRB0-Centre      | -14.77% | -32.58% | -29.51% | -28.33% | -28.33% | -29.58% | -29.88% | -29.95% | -29.96% | -29.97% | -29.97% |
| BE23-Oost-Vlaand | -26.23% | -29.71% | -28.13% | -29.01% | -28.41% | -28.58% | -28.82% | -29.10% | -29.42% | -29.77% | -30.13% |
| FRC1-Bourgogne   | -11.86% | -28.59% | -30.07% | -30.57% | -30.57% | -30.43% | -30.38% | -30.37% | -30.37% | -30.37% | -30.36% |
| HR02-Panonska Hr | -35.44% | -33.08% | -33.27% | -34.41% | -34.41% | -33.60% | -32.90% | -32.30% | -31.77% | -31.30% | -30.85% |
| BE22-Limburg     | -25.66% | -27.77% | -27.79% | -29.66% | -29.34% | -29.53% | -29.78% | -30.09% | -30.43% | -30.81% | -31.21% |
| BE25-West-Vlaand | -26.57% | -32.36% | -31.74% | -30.88% | -30.60% | -30.80% | -31.07% | -31.41% | -31.79% | -32.21% | -32.65% |
| HR05-Grad Zagreb | -34.98% | -35.81% | -37.10% | -36.42% | -36.42% | -35.61% | -34.92% | -34.32% | -33.80% | -33.33% | -32.88% |
| AT11-Burgenland  | -34.45% | -36.27% | -35.71% | -34.38% | -36.52% | -36.01% | -35.64% | -35.37% | -35.20% | -35.07% | -34.96% |
| BE34-Luxembourg  | -26.49% | -29.40% | -30.02% | -32.49% | -32.99% | -33.27% | -33.67% | -34.17% | -34.75% | -35.38% | -36.05% |
| Q3               | -3.09%  | -2.08%  | -1.93%  | -2.04%  | -2.07%  | -2.10%  | -2.13%  | -2.16%  | -2.33%  | -2.52%  | -2.67%  |
| Median           | -10.66% | -10.37% | -9.84%  | -9.51%  | -9.88%  | -9.67%  | -9.41%  | -9.20%  | -8.65%  | -8.09%  | -8.02%  |
| Average          | -10.58% | -11.78% | -11.46% | -11.54% | -12.42% | -12.33% | -12.17% | -12.01% | -11.85% | -11.71% | -11.58% |
| Q1               | -16.59% | -20.89% | -20.79% | -21.35% | -24%    | -23.97% | -23.09% | -22.60% | -22.07% | -21.58% | -21.11% |
